# Supplementary material for: A Randomized Cross-Over Study Comparing Cooling Methods for Exercise-Induced Hyperthermia in Working Dogs in Training
Source: MDPI journal article supplement (doi:10.3390/ani13233673), 2023-11-28
Supplement: s1 [file s1]

## Supplementary Tables

Table S1. Study Participant information

This table contains descriptive information about the canine participants in the study. Age is presented in months and weight is presented in pounds. Body condition score is on a 9-point scale and was evaluated by a veterinarian. Dogs were randomly assigned to a group at the start of the study.

| Participant Number | Breed              | Age (months) | Sex    | Weight in pounds (mean of trial days) | Body Condition Score | Group Number |
|--------------------|--------------------|--------------|--------|---------------------------------------|----------------------|--------------|
| 1                  | Dutch Shepherd     | 11           | Female | 47.4                                  | 4.0                  | 1            |
| 2                  | German Shepherd    | 80           | Female | 73.1                                  | 5.5                  | 1            |
| 3                  | Labrador Retriever | 13           | Male   | 68.4                                  | 5.0                  | 1            |
| 4                  | Labrador Retriever | 63           | Female | 49.2                                  | 4.5                  | 2            |
| 5                  | German Shepherd    | 101          | Female | 64.3                                  | 5.0                  | 2            |
| 6                  | Labrador Retriever | 10           | Female | 50.6                                  | 5.0                  | 2            |
| 7                  | Labrador Retriever | 13           | Female | 53.7                                  | 5.0                  | 2            |
| 8                  | Dutch Shepherd     | 14           | Female | 46.4                                  | 4.0                  | 2            |
| 9                  | German Shepherd    | 13           | Male   | 76.9                                  | 6.0                  | 1            |
| 10                 | Labrador Retriever | 20           | Female | 51.7                                  | 4.5                  | 1            |
| 11                 | Labrador Retriever | 20           | Female | 63.4                                  | 4.5                  | 2            |
| 12                 | Labrador Retriever | 16           | Male   | 67.9                                  | 6.5                  | 1            |

Table S2. Trial day weather information

This table shows the average temperature, humidity, and heat index on each of the study days, as well as the standard deviation. Temperature and humidity are presented in Fahrenheit and Celsius. Humidity is presented as a percentage.

| Date | Average Ambient Temperature: °F (°C) | Standard Deviation of Ambient Temperature: °F (°C) | Average Humidity (%) | Standard Deviation of Humidity (%) | Average Heat Index: °F (°C) | Standard Deviation of Average Heat Index °F (°C) |
|------|--------------------------------------|----------------------------------------------------|----------------------|------------------------------------|-----------------------------|--------------------------------------------------|
|------|--------------------------------------|----------------------------------------------------|----------------------|------------------------------------|-----------------------------|--------------------------------------------------|

|         |             |            |      |     |             |           |
|---------|-------------|------------|------|-----|-------------|-----------|
| 7/18/22 | 83.2 (28.4) | 1.7 (1.0)  | 76.7 | 4.5 | 90.5 (32.5) | 3 (1.7)   |
| 7/19/22 | 80.2 (26.8) | 1.5 (0.8)  | 64.5 | 4.3 | 83.8 (28.8) | 1.6 (0.9) |
| 7/21/22 | 83.8 (28.8) | 0.84 (0.5) | 75.2 | 1.8 | 91.8 (33.2) | 1.3 (0.7) |
| 7/22/22 | 83.7 (28.7) | 1.4 (0.8)  | 55.0 | 3.6 | 87.0 (30.6) | 0.9 (0.5) |
| 7/26/22 | 74.0 (23.3) | 0.7 (0.4)  | 57.8 | 2.5 | 74.0 (23.3) | 0.7 (0.4) |
| 7/29/22 | 75.6 (24.2) | 0.5 (0.3)  | 79.8 | 1.1 | 75.6 (24.2) | 0.5 (0.3) |
